# Supplementary material for: A Test of Three Sadism Measures
Source: Atypon-hosted journal article supplement (doi:10.1027/1614-0001/a000319), 2020-03-26
Supplement: 1614-0001_a000319_esm1.pdf [file 1614-0001_a000319_esm1.pdf]

## **Electronic Supplemental Material**

### **A. Short Sadistic Impulse Scale - SSIS**

1. Ljudi bi uživali u povređivanju drugih kada bi samo pokušali.
2. Bilo bi uzbudljivo povređivati ljude.
3. Povređivao sam ljude prosto zato što mi se moglo.
- 4R. Ne bih namerno povredio nekoga.
5. Povređivao sam ljude zarad sopstvenog uživanja.
6. Ponižavao sam ljude kako bih ih držao pod kontrolom.
7. Uživao bih kada bih nekoga povredio fizički, seksualno ili emocionalno.
8. Uživam kada vidim ljude kako pate.
9. Imam fantazije u kojima povređujem ljude.
10. Ponekad se toliko razbesnim, da želim da povredim ljude.

## **B. Varieties of Sadistic Tendencies - VAST**

1. U video igrama mi se sviđaju realistične scene u kojima krv šiklja na sve strane.
2. Ponekad ponovo premotavam moje omiljene scene iz brutalnih filmova.
3. Uživam da gledam borbe u ringu u kojima su dozvoljeni svi udarci.
- 4R. Ponekad skrenem pogled dok gledam neke scene u horor filmovima.
5. Kada gledam auto-trke, najzanimljiviji su mi sudari i izletanja sa staze.
- 6R. Ima previše nasilja u sportovima.
7. Volim da gledam YouTube snimke na kojima se ljudi tuku.
8. Uživam da fizički povredim ljude.
- 9R. Nikada ne bih namerno ponizio nekoga.
10. U srednjoj školi sam namerno bio zao prema nekima.
11. Uživam da povredim partnera tokom seksa (ili da se pretvaram da to radim).
12. Kontrolišem ljude tako što ih zastrašujem.
13. Uživam da gledam ljude kako pate.
14. Uživam da ismevam gubitnike njima u lice.
- 15R. Nikada nisam rekao nešto zlobno svojim roditeljima.
16. Uživam da mučim životinje, posebno one gadne.

### **C. Assessment of Sadistic Personality - ASP**

1. Ismejao sam druge kako bi znali da sam glavni.
2. Nikada mi neće dosaditi da zastrašujem ljude.
3. Povrediću nekoga ako to znači da ću biti glavni.
4. Kada zadirkujem nekoga, zabavno je videti ga kako postaje uznemiren.
5. Biti zao prema drugima može biti zabavno.
6. Pričinjava mi zadovoljstvo da zadirkujem druge pred njihovim prijateljima.
7. Uzbuduje me kada gledam ljude kako se tuku.
8. Razmišljam o tome da povredim ljude koji me nerviraju.
- 9R. Ne bih namerno povredio nikoga, čak i ako mi se ne sviđa.

*Note.* R - reverse coded items.

Table A

*Parameters for dark traits Model 2 with separate direct and vicarious sadism items*

| Direct or "core" sadism | Parameter | Error |
|-------------------------|-----------|-------|
| SSIS1                   | 0.463     |       |
| SSIS2                   | 0.642     | 0.103 |
| SSIS3                   | 0.660     | 0.124 |
| SSIS4                   | -0.379    | 0.239 |
| SSIS5                   | 0.510     | 0.127 |
| SSIS6                   | 0.688     | 0.140 |
| SSIS7                   | 0.590     | 0.116 |
| SSIS8                   | 0.472     | 0.110 |
| SSIS9                   | 0.592     | 0.166 |
| SSIS10                  | 0.586     | 0.237 |
| ASP1                    | 0.730     | 0.170 |
| ASP2                    | 0.561     | 0.164 |
| ASP3                    | 0.623     | 0.137 |
| ASP4                    | 0.678     | 0.204 |
| ASP5                    | 0.707     | 0.194 |
| ASP6                    | 0.603     | 0.150 |
| ASP7                    | 0.667     | 0.181 |
| ASP8                    | 0.709     | 0.215 |
| ASP9                    | -0.322    | 0.209 |
| VAST8                   | 0.596     | 0.113 |
| VAST9                   | -0.336    | 0.222 |
| VAST10                  | 0.603     | 0.210 |
| VAST11                  | 0.521     | 0.166 |
| VAST12                  | 0.649     | 0.154 |
| VAST13                  | 0.542     | 0.094 |
| VAST14                  | 0.687     | 0.137 |
| VAST15                  | -0.258    | 0.204 |
| VAST16                  | 0.377     | 0.120 |
| Vicarious sadism        |           |       |
| VAST1                   | 0.651     |       |
| VAST2                   | 0.655     | 0.099 |
| VAST3                   | 0.663     | 0.114 |
| VAST4                   | -0.370    | 0.135 |
| VAST5                   | 0.598     | 0.103 |
| VAST6                   | -0.274    | 0.103 |
| VAST7                   | 0.713     | 0.127 |
| Machiavellianism        |           |       |
| SD1                     | 0.153     |       |
| SD2                     | 0.680     | 2.597 |
| SD3                     | 0.774     | 2.845 |
| SD4                     | 0.425     | 1.754 |

---

|                            |       |       |
|----------------------------|-------|-------|
| SD5                        | 0.753 | 3.310 |
| SD6                        | 0.695 | 3.046 |
| SD7                        | 0.311 | 1.154 |
| SD8                        | 0.335 | 1.497 |
| SD9                        | 0.489 | 2.048 |
| Narcissism                 |       |       |
| SD10                       | 0.648 |       |
| SD11                       | 0.438 | 0.107 |
| SD12                       | 0.626 | 0.102 |
| SD13                       | 0.684 | 0.130 |
| SD14                       | 0.573 | 0.117 |
| SD15                       | 0.310 | 0.104 |
| SD16                       | 0.490 | 0.139 |
| SD17                       | 0.482 | 0.110 |
| SD18                       | 0.420 | 0.102 |
| Psychopathy                |       |       |
| SD19                       | 0.588 |       |
| SD20                       | 0.211 | 0.092 |
| SD21                       | 0.626 | 0.114 |
| SD22                       | 0.568 | 0.087 |
| SD23                       | 0.584 | 0.089 |
| SD24                       | 0.610 | 0.101 |
| SD25                       | 0.264 | 0.109 |
| SD26                       | 0.432 | 0.104 |
| SD27                       | 0.648 | 0.094 |
| Covariances                |       |       |
| Direct or "core" sadism ~~ |       |       |
| Vicarious sadism           | 0.719 | 0.049 |
| Machiavellianism           | 0.504 | 0.015 |
| Narcissism                 | 0.401 | 0.033 |
| Psychopathy                | 0.785 | 0.048 |
| Vicarious sadism ~~        |       |       |
| Machiavellianism           | 0.467 | 0.028 |
| Narcissism                 | 0.317 | 0.045 |
| Psychopathy                | 0.650 | 0.064 |
| Machiavellianism ~~        |       |       |
| Narcissism                 | 0.634 | 0.035 |
| Psychopathy                | 0.814 | 0.042 |
| Narcissism ~~              |       |       |
| Psychopathy                | 0.636 | 0.056 |

---
